# Supplementary material for: Clinical characteristics and outcomes of patients with post-stroke epilepsy: protocol for an individual patient data meta-analysis from the International Post-stroke Epilepsy Research Repository (IPSERR)
Source: HighWire-hosted journal article supplement (doi:10.1136/bmjopen-2023-078684), 2023-11-01
Supplement: bmjopen-2023-078684supp001_data_supplement.pdf [file bmjopen-2023-078684supp001_data_supplement.pdf]

**Detailed search strategy**

Ovid MEDLINE(R) ALL

|   |                                                                                                                                                                                                                                                                                                                                                                               |
|---|-------------------------------------------------------------------------------------------------------------------------------------------------------------------------------------------------------------------------------------------------------------------------------------------------------------------------------------------------------------------------------|
| 1 | cerebrovascular disorders/ or basal ganglia cerebrovascular disease/ or exp brain ischemia/ or carotid artery diseases/ or carotid artery thrombosis/ or intracranial arterial diseases/ or cerebral arterial diseases/ or exp "intracranial embolism and thrombosis"/ or exp stroke/                                                                                         |
| 2 | (isch?emi\$ adj6 (stroke\$ or apoplex\$ or cerebral vasc\$ or cerebrovasc\$ or cva or attack\$)).tw,kf.                                                                                                                                                                                                                                                                       |
| 3 | ((brain or cerebr\$ or cerebell\$ or vertebrobasil\$ or hemispher\$ or intracran\$ or intracerebral or infratentorial or supratentorial or middle cerebral artery or MCA\$ or anterior circulation or posterior circulation or basilar artery or vertebral artery or space occupying) adj5 (isch?emi\$ or infarct\$ or thrombo\$ or emboli\$ or occlus\$ or hypoxi\$)).tw,kf. |
| 4 | 1 or 2 or 3                                                                                                                                                                                                                                                                                                                                                                   |
| 5 | ((post* or after or following) adj6 (seizure* or convulsi* or epilep*)).tw,kf.                                                                                                                                                                                                                                                                                                |
| 6 | (exp epilepsy/ or exp seizures/) and ((post* or onset).tw,kf. or (after or following).ti.)                                                                                                                                                                                                                                                                                    |
| 7 | 5 or 6                                                                                                                                                                                                                                                                                                                                                                        |
| 8 | 4 and 7                                                                                                                                                                                                                                                                                                                                                                       |
| 9 | 8 not (animals/ not (animals/ and humans/))                                                                                                                                                                                                                                                                                                                                   |

Embase (Ovid)

|    |                                                                                                                                                                                                                                                                                                  |
|----|--------------------------------------------------------------------------------------------------------------------------------------------------------------------------------------------------------------------------------------------------------------------------------------------------|
| 1  | *cerebrovascular disease/ or *cerebral artery disease/ or *cerebrovascular accident/ or *stroke/ or *vertebrobasilar insufficiency/ or *carotid artery disease/ or exp *carotid artery obstruction/ or exp *brain infarction/ or exp *brain ischemia/ or exp *occlusive cerebrovascular disease/ |
| 2  | (isch?emi\$ adj6 (stroke\$ or apoplex\$ or cerebral vasc\$ or cerebrovasc\$ or cva or attack\$)).tw,kw.                                                                                                                                                                                          |
| 3  | ((brain or cerebr\$ or cerebell\$ or vertebrobasil\$ or hemispher\$ or intracran\$ or intracerebral or infratentorial or supratentorial or middle cerebr\$ or mca\$ or anterior circulation) adj5 (isch?emi\$ or infarct\$ or thrombo\$ or emboli\$ or occlus\$ or hypoxi\$)).tw,kw.             |
| 4  | 1 or 2 or 3                                                                                                                                                                                                                                                                                      |
| 5  | ((post* or after or following) adj6 (seizure* or convulsi* or epilep*)).tw,kw.                                                                                                                                                                                                                   |
| 6  | (exp *epilepsy/ or exp *seizures/) and ((post* or onset).tw,kw. or (after or following).ti.)                                                                                                                                                                                                     |
| 7  | 5 or 6                                                                                                                                                                                                                                                                                           |
| 8  | 4 and 7                                                                                                                                                                                                                                                                                          |
| 9  | 8 not ((exp animal/ or nonhuman/) not exp human/)                                                                                                                                                                                                                                                |
| 10 | limit 9 to conference abstracts                                                                                                                                                                                                                                                                  |
| 11 | 9 not 10                                                                                                                                                                                                                                                                                         |

APA PsycInfo &lt;1806 to February Week 3 2022&gt;

|   |                                                                                                                                    |
|---|------------------------------------------------------------------------------------------------------------------------------------|
| 1 | cerebrovascular disorders/ or cerebral hemorrhage/ or cerebral ischemia/ or cerebrovascular accidents/ or subarachnoid hemorrhage/ |
|---|------------------------------------------------------------------------------------------------------------------------------------|

|    |                                                                                                                                                                                                                                                                                                                                                               |
|----|---------------------------------------------------------------------------------------------------------------------------------------------------------------------------------------------------------------------------------------------------------------------------------------------------------------------------------------------------------------|
| 2  | (stroke* or intracerebral h?emorrhage*).tw.                                                                                                                                                                                                                                                                                                                   |
| 3  | (isch?emi* adj6 (stroke* or apoplex* or cerebral vasc* or cerebrovasc* or cva or attack*).tw.                                                                                                                                                                                                                                                                 |
| 4  | ((brain or cerebr* or cerebell* or vertebrobasil* or hemispher* or intracran* or intracerebral or infratentorial or supratentorial or middle cerebral artery or MCA* or anterior circulation or posterior circulation or basilar artery or vertebral artery or space occupying) adj5 (isch?emi* or infarct* or thrombo* or emboli* or occlus* or hypoxi*).tw. |
| 5  | 1 or 2 or 3 or 4                                                                                                                                                                                                                                                                                                                                              |
| 6  | ((post* or after or following) adj6 (seizure* or convulsi* or epilep*).tw.                                                                                                                                                                                                                                                                                    |
| 7  | (exp epilepsy/ or exp seizures/) and ((post* or onset).tw. or (after or following).ti.)                                                                                                                                                                                                                                                                       |
| 8  | 6 or 7                                                                                                                                                                                                                                                                                                                                                        |
| 9  | 5 and 8                                                                                                                                                                                                                                                                                                                                                       |
| 10 | 9 not (animal not human).po.                                                                                                                                                                                                                                                                                                                                  |
| 11 | limit 10 to ("0200 book" or "0240 authored book" or "0280 edited book" or "0300 encyclopedia" or "0400 dissertation abstract")                                                                                                                                                                                                                                |
| 12 | 10 not 11                                                                                                                                                                                                                                                                                                                                                     |

## Web of Science

|   |                                                                                                                                                                                                                                                                                                                                                                                                                                                                                                                                                                                                                                                                                                                                                                                                                                                                                                                                                                                                                                                                                                                                           |
|---|-------------------------------------------------------------------------------------------------------------------------------------------------------------------------------------------------------------------------------------------------------------------------------------------------------------------------------------------------------------------------------------------------------------------------------------------------------------------------------------------------------------------------------------------------------------------------------------------------------------------------------------------------------------------------------------------------------------------------------------------------------------------------------------------------------------------------------------------------------------------------------------------------------------------------------------------------------------------------------------------------------------------------------------------------------------------------------------------------------------------------------------------|
| 1 | TI=((post* or after or following) NEAR/6 (seizure* or convulsi* or epilep*)) OR AB==((post* or after or following) NEAR/6 (seizure* or convulsi* or epilep*)) OR AK==((post* or after or following) NEAR/6 (seizure* or convulsi* or epilep*))                                                                                                                                                                                                                                                                                                                                                                                                                                                                                                                                                                                                                                                                                                                                                                                                                                                                                            |
| 2 | TI=((brain or cerebr* or cerebell* or vertebrobasil* or hemispher* or intracran* or intracerebral or infratentorial or supratentorial or "middle cerebral artery" or MCA* or "anterior circulation" or "posterior circulation" or "basilar artery" or "vertebral artery" or "space occupying") NEAR/5 (isch?emi* OR infarct* OR thrombo* OR emboli* or occlus* or hypoxi*)) OR AB=((brain or cerebr* or cerebell* or vertebrobasil* or hemispher* or intracran* or intracerebral or infratentorial or supratentorial or "middle cerebral artery" or MCA* or "anterior circulation" or "posterior circulation" or "basilar artery" or "vertebral artery" or "space occupying") NEAR/5 (isch?emi* OR infarct* OR thrombo* OR emboli* or occlus* or hypoxi*)) OR AK=((brain or cerebr* or cerebell* or vertebrobasil* or hemispher* or intracran* or intracerebral or infratentorial or supratentorial or "middle cerebral artery" or MCA* or "anterior circulation" or "posterior circulation" or "basilar artery" or "vertebral artery" or "space occupying") NEAR/5 (isch?emi* OR infarct* OR thrombo* OR emboli* or occlus* or hypoxi*)) |
| 3 | TI=(stroke* or "intracerebral h?emorrhage*") OR AB=(stroke* or "intracerebral h?emorrhage*") OR AK=(stroke* or "intracerebral h?emorrhage*")                                                                                                                                                                                                                                                                                                                                                                                                                                                                                                                                                                                                                                                                                                                                                                                                                                                                                                                                                                                              |
| 4 | TI=(isch?emi* NEAR/6 (stroke* or apoplex* or "cerebral vasc*" or cerebrovasc* or cva or attack*)) OR AB=(isch?emi* NEAR/6 (stroke* or apoplex* or "cerebral vasc*" or cerebrovasc* or cva or attack*)) OR AK=(isch?emi* NEAR/6 (stroke* or apoplex* or "cerebral vasc*" or cerebrovasc* or cva or attack*))                                                                                                                                                                                                                                                                                                                                                                                                                                                                                                                                                                                                                                                                                                                                                                                                                               |
| 5 | #2 OR #3 OR #4                                                                                                                                                                                                                                                                                                                                                                                                                                                                                                                                                                                                                                                                                                                                                                                                                                                                                                                                                                                                                                                                                                                            |
| 6 | #1 and #5                                                                                                                                                                                                                                                                                                                                                                                                                                                                                                                                                                                                                                                                                                                                                                                                                                                                                                                                                                                                                                                                                                                                 |
| 7 | #1 AND #5 and Meeting Abstracts (Exclude – Document Types)                                                                                                                                                                                                                                                                                                                                                                                                                                                                                                                                                                                                                                                                                                                                                                                                                                                                                                                                                                                                                                                                                |

## Cochrane

|    |                                                                                                                                                                                                                                                                                                                                                                                                                                                                                                                                                                                                                                |
|----|--------------------------------------------------------------------------------------------------------------------------------------------------------------------------------------------------------------------------------------------------------------------------------------------------------------------------------------------------------------------------------------------------------------------------------------------------------------------------------------------------------------------------------------------------------------------------------------------------------------------------------|
| #1 | ((post* or after or following) NEAR/6 (seizure* or convulsi* or epilep*)):ti,ab,kw                                                                                                                                                                                                                                                                                                                                                                                                                                                                                                                                             |
| #2 | [mh ^"cerebrovascular disorders"] or [mh ^"basal ganglia cerebrovascular disease"] or [mh "brain ischemia"] or [mh ^"carotid artery diseases"] or [mh ^"carotid artery thrombosis"] or [mh ^"carotid artery, internal, dissection"] or [mh ^"stroke, lacunar"] or [mh ^"intracranial arterial diseases"] or [mh ^"cerebral arterial diseases"] or [mh ^"infarction, anterior cerebral artery"] or [mh ^"infarction, middle cerebral artery"] or [mh ^"infarction, posterior cerebral artery"] or [mh "intracranial embolism and thrombosis"] or [mh ^stroke] or [mh "brain infarction"] or [mh ^"vertebral artery dissection"] |
| #3 | ((brain or cerebr* or cerebell* or vertebrobasil* or hemispher* or intracran* or intracerebral or infratentorial or supratentorial or middle cerebr* or mca* or anterior circulation) near/5 (isch*emi* or infarct* or thrombo* or emboli* or occlus* or hypoxi*)):ti,ab,kw                                                                                                                                                                                                                                                                                                                                                    |
| #4 | (isch*emi* near/6 (stroke* or apoplex* or cerebral vasc* or cerebrovasc* or cva or attack*)):ti,ab,kw                                                                                                                                                                                                                                                                                                                                                                                                                                                                                                                          |
| #5 | #2 or #3 or #4                                                                                                                                                                                                                                                                                                                                                                                                                                                                                                                                                                                                                 |
| #6 | #1 and #5                                                                                                                                                                                                                                                                                                                                                                                                                                                                                                                                                                                                                      |
|    | <a href="#">Cochrane Database of Systematic Reviews</a><br>Issue 3 of 12, March 2022                                                                                                                                                                                                                                                                                                                                                                                                                                                                                                                                           |
|    | <a href="#">Cochrane Central Register of Controlled Trials</a><br>Issue 2 of 12, February 2022                                                                                                                                                                                                                                                                                                                                                                                                                                                                                                                                 |
